# Supplementary material for: Prenylcysteine oxidase 1, an emerging player in atherosclerosis
Source: PubMed Central journal article supplement (PMC8455616; doi:10.1038/s42003-021-02630-z), 2021-09-21
Supplement: 42003_2021_2630_MOESM2_ESM.pdf [file 42003_2021_2630_MOESM2_ESM.pdf]

## Description of Additional Supplementary Files

**File name:** Supplementary Data 1.

**Description:** Functional enrichments in the network created by STRING with secreted proteins modulated by PCYOX1 silencing. Related to Figure 2.
